# Supplementary material for: Considerable knock-on displacement of metal atoms under a low energy electron beam
Source: PubMed Central journal article supplement (PMC5428036; doi:10.1038/s41598-017-00251-3), 2017-03-15
Supplement: 41598_2017_251_MOESM1_ESM.pdf [file 41598_2017_251_MOESM1_ESM.pdf]

1 **Considerable knock-on displacement of metal atoms under a low energy electron beam**

2 Hengfei Gu <sup>a,b</sup>, Geping Li <sup>a,c\*</sup> Chengze Liu <sup>a,c</sup>, Fusen Yuan <sup>a,c</sup>, Fuzhou Han <sup>a,c</sup>, Lifeng Zhang <sup>a,b</sup>,  
3 Songquan Wu <sup>d</sup>

4 *<sup>a</sup>Institute of Metal Research, Chinese Academy of Sciences, 72 Wenhua Road, Shenyang 110016,*  
5 *People's Republic of China*

6 *<sup>b</sup>University of Chinese Academy of Sciences, 19 Yuquan Road, Beijing 100049, People's Republic of*  
7 *China*

8 *<sup>c</sup>University of Science and Technology of China, 96 Jinzhai Road, Hefei 230026, People's Republic*  
9 *of China*

10 *<sup>d</sup>Key Laboratory of Optoelectronic Materials Chemical and Physics, Fujian Institute of Research on*  
11 *The Structure of Matter, Chinese Academy of Sciences, 155 Yangqiao Road West, Fuzhou 350002 ,*  
12 *People's Republic of China*

13  
14 **Video Legend**

15 **Considerable knock-on displacement of zirconium atoms under a low energy electron beam.**

16 Under focused and stationary electron beam at 30 kV in a field-emission scanning electron  
17 microscope (FE-SEM), nanoscale precipitates within the surface layer of Zircaloy-4 specimen  
18 gradually emerged and became clearly visible with increasing the irradiation time.
